# Supplementary material for: Serum Metabolomics Reveals Serotonin as a Predictor of Severe Dengue in the Early Phase of Dengue Fever
Source: PubMed Central journal article supplement (PMC4824427; doi:10.1371/journal.pntd.0004607), 2016-04-07

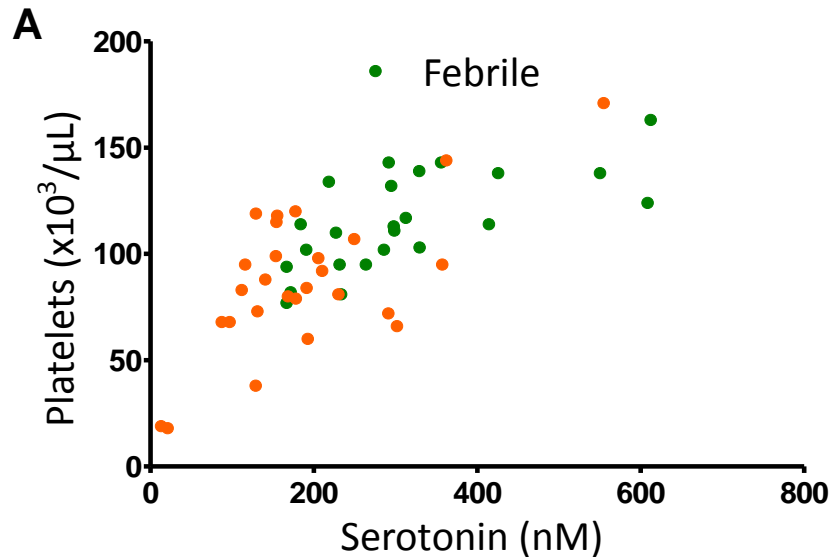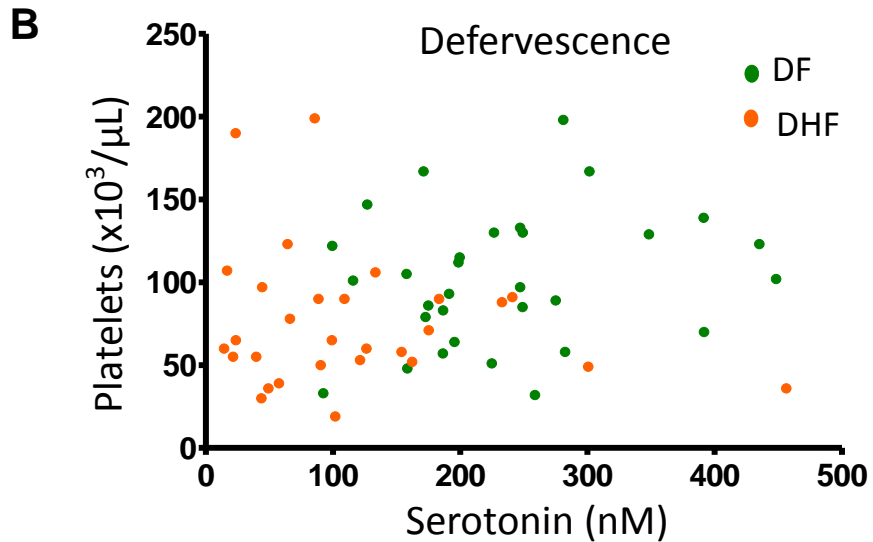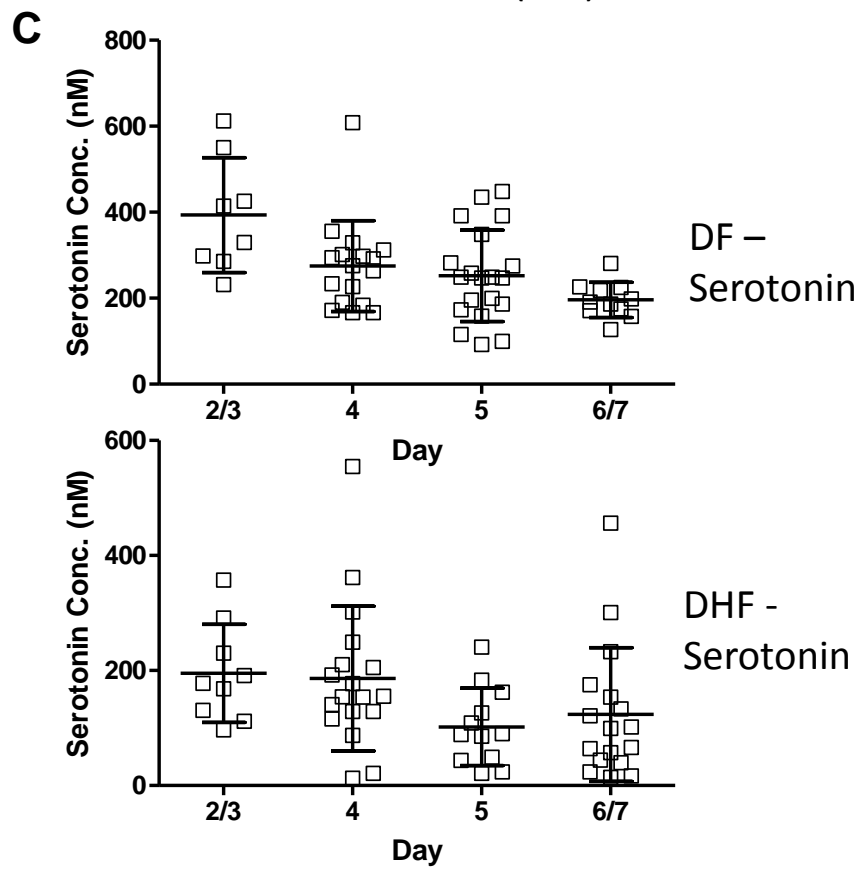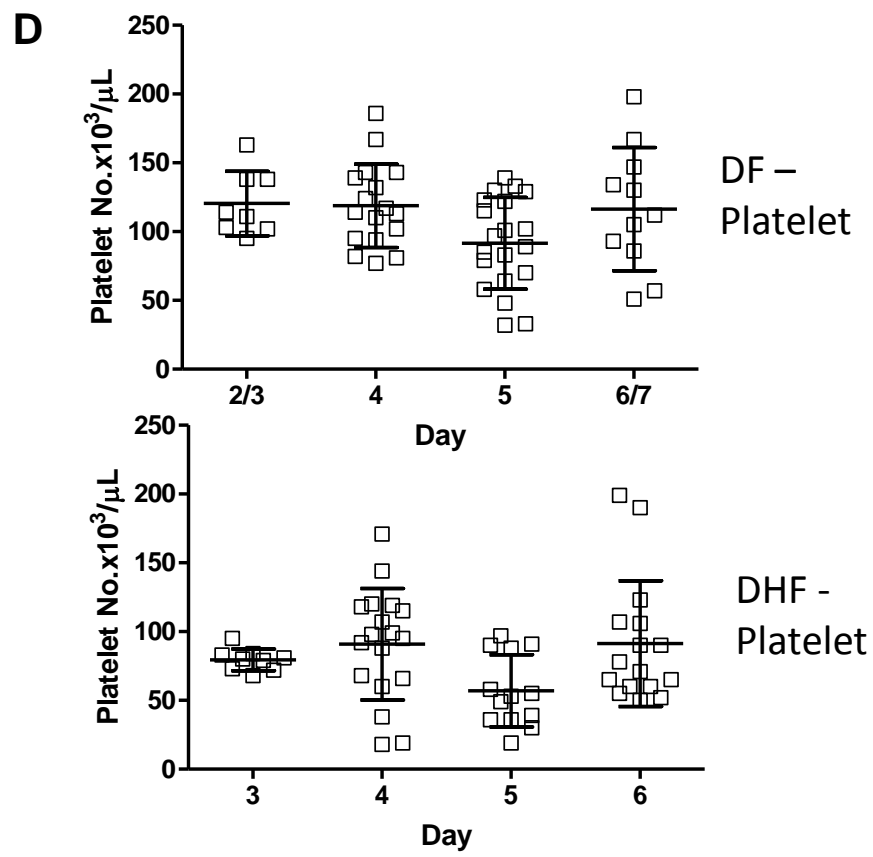

Supplement: pntd.0004607.s004.pdf [file pntd.0004607.s004.pdf]
