# Supplementary material for: Serum Metabolomics Reveals Serotonin as a Predictor of Severe Dengue in the Early Phase of Dengue Fever
Source: PubMed Central journal article supplement (PMC4824427; doi:10.1371/journal.pntd.0004607), 2016-04-07

**A**

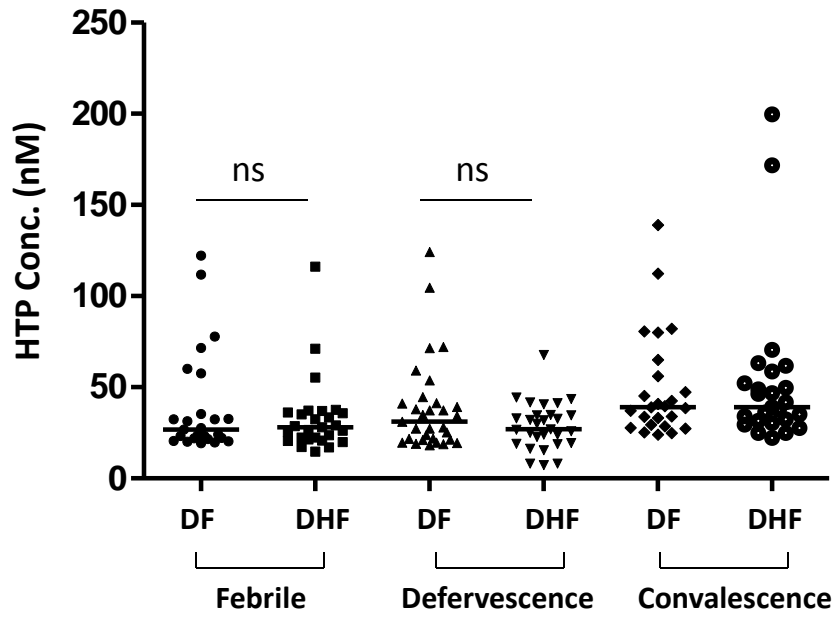

**B**

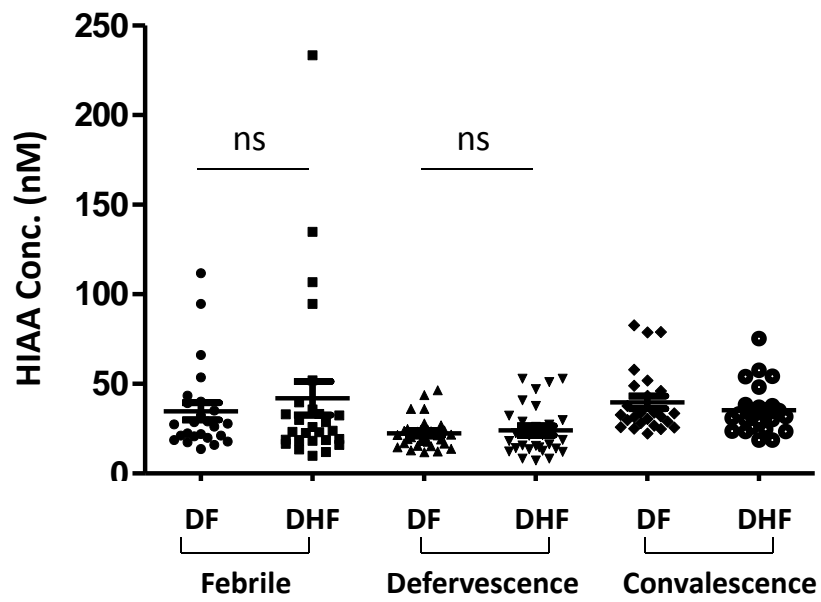

Supplement: pntd.0004607.s005.pdf [file pntd.0004607.s005.pdf]
