# Supplementary material for: Serum Metabolomics Reveals Serotonin as a Predictor of Severe Dengue in the Early Phase of Dengue Fever
Source: PubMed Central journal article supplement (PMC4824427; doi:10.1371/journal.pntd.0004607), 2016-04-07
Supplement: pntd.0004607.s006.pdf [file pntd.0004607.s006.pdf]

**A**

Serotonin

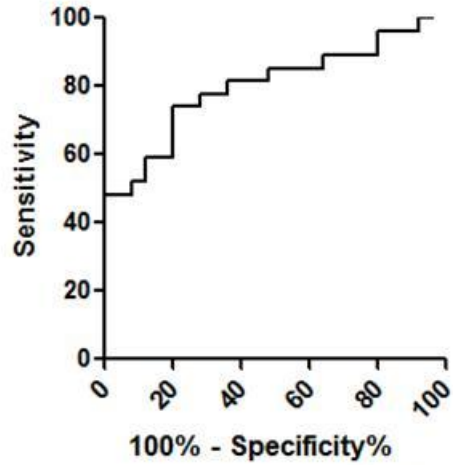

|                         |              |
|-------------------------|--------------|
| Area                    | 0.80         |
| Std. Error              | 0.06         |
| 95% confidence interval | 0.68 to 0.92 |
| P value                 | 0.0002       |

**B**

Kynurenine

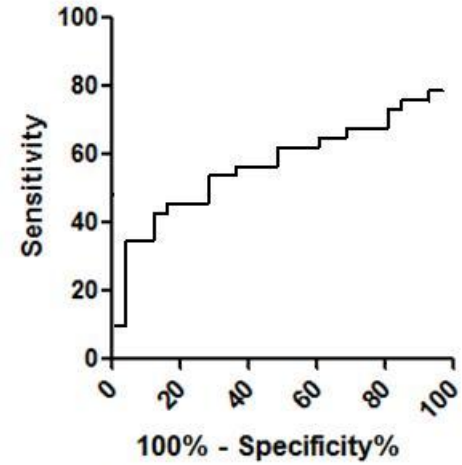

|                         |              |
|-------------------------|--------------|
| Area                    | 0.72         |
| Std. Error              | 0.07         |
| 95% confidence interval | 0.57 to 0.85 |
| P value                 | 0.008        |
