# Supplementary material for: Serum Metabolomics Reveals Serotonin as a Predictor of Severe Dengue in the Early Phase of Dengue Fever
Source: PubMed Central journal article supplement (PMC4824427; doi:10.1371/journal.pntd.0004607), 2016-04-07

**IFN $\gamma$** 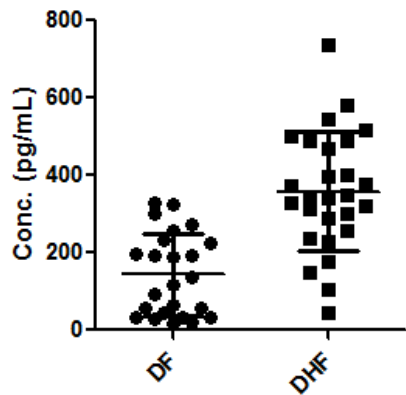**IL1b**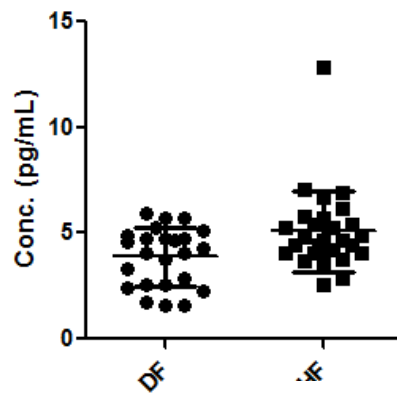**IL4**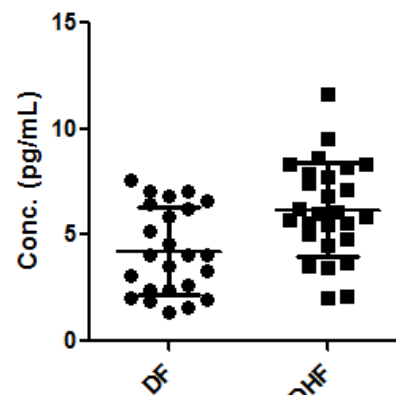**IL8**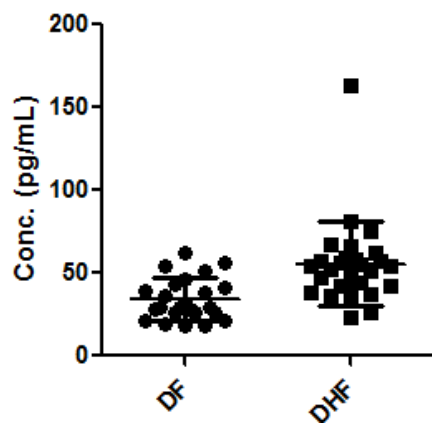**MIP1b**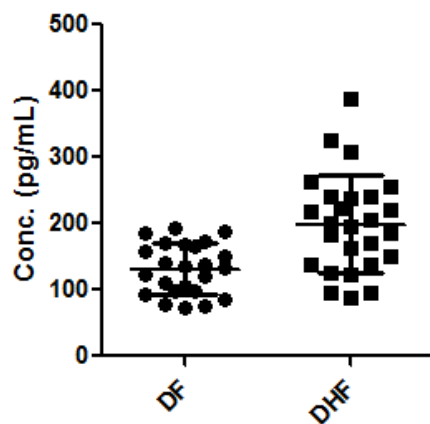**FGFbasic**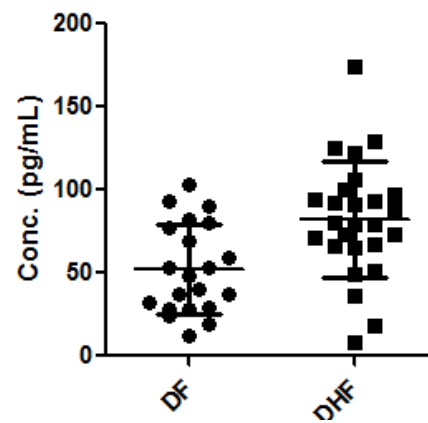**IL-10**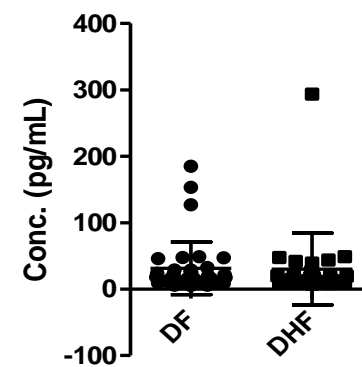**G-CSF**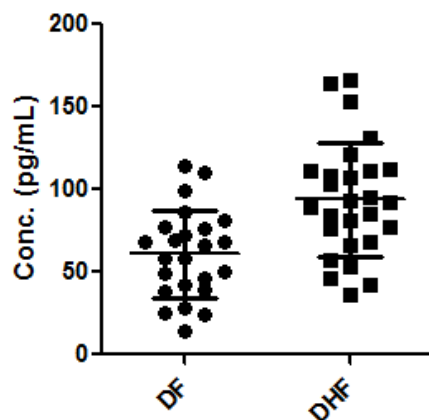**TNF $\alpha$** 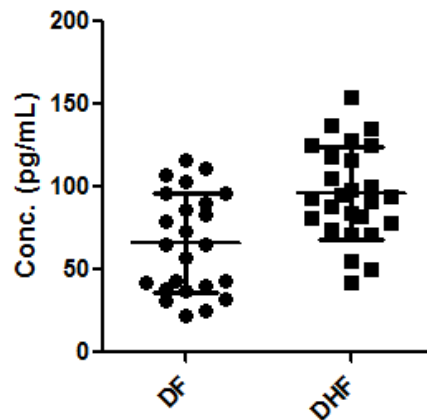**RANTES**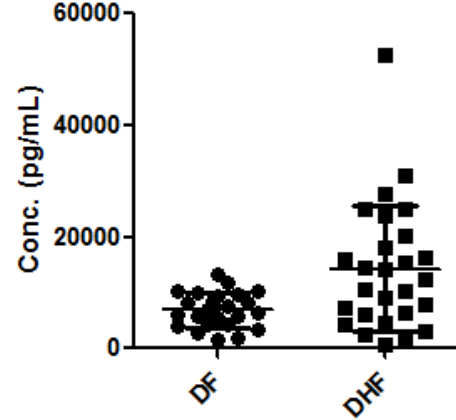

Supplement: pntd.0004607.s007.pdf [file pntd.0004607.s007.pdf]
