# Supplementary material for: Serum Metabolomics Reveals Serotonin as a Predictor of Severe Dengue in the Early Phase of Dengue Fever
Source: PubMed Central journal article supplement (PMC4824427; doi:10.1371/journal.pntd.0004607), 2016-04-07
Supplement: pntd.0004607.s008.pdf [file pntd.0004607.s008.pdf]

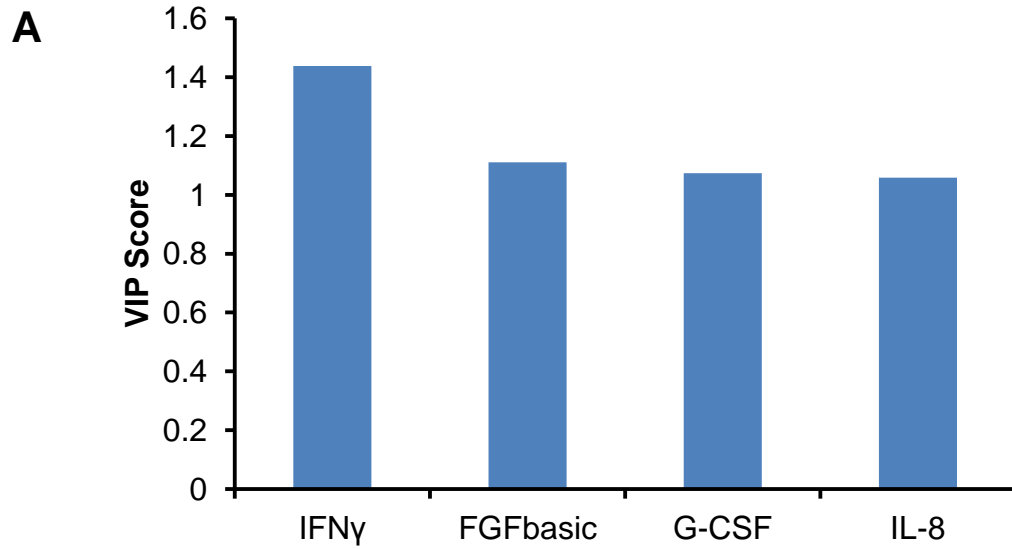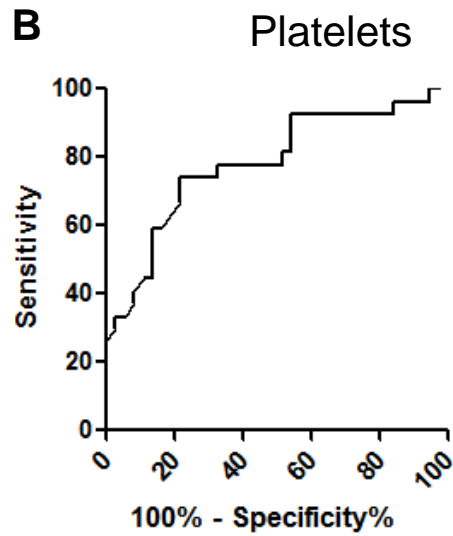

|                         |              |
|-------------------------|--------------|
| Area                    | 0.78         |
| Std. Error              | 0.06         |
| 95% confidence interval | 0.66 to 0.90 |
| P value                 | 0.0001       |

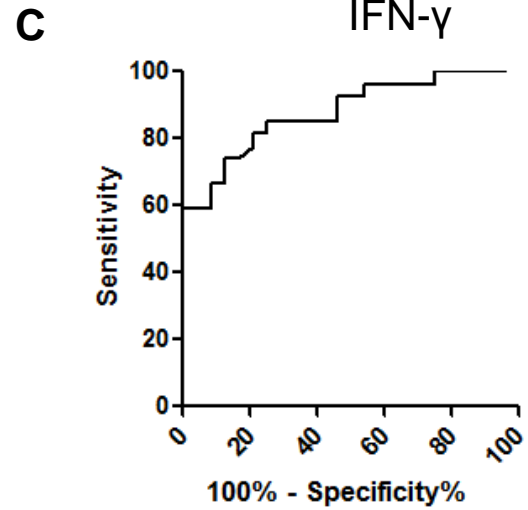

|                         |              |
|-------------------------|--------------|
| Area                    | 0.88         |
| Std. Error              | 0.05         |
| 95% confidence interval | 0.79 to 0.97 |
| P value                 | < 0.0001     |
