# Supplementary material for: Serum Metabolomics Reveals Serotonin as a Predictor of Severe Dengue in the Early Phase of Dengue Fever
Source: PLoS Negl Trop Dis. 2016 Apr 7;10(4):e0004607. doi: 10.1371/journal.pntd.0004607 (PMC4824427; doi:10.1371/journal.pntd.0004607)
Supplement: S1 Table — (XLSX) [file pntd.0004607.s009.xlsx]

## Sheet: Sheet1
Mass@Retention time	Calculated chemical Formula	Potential metabolite	HMDB	fold change (DHF/DF)
244.1679@8.345943	C13 H24 O4	1,11-Undecanedicarboxylic acid	HMDB02327	1.10643
300.2663@11.190615	C18 H36 O3	13-hydroxyoctadecanoic acid	HMDB61662	1.73467
296.2362@10.015552	C18 H32 O3	13S-hydroxyoctadecadienoic acid	HMDB04667	1.84491
413.2951@12.351098	C26 H39 N O3	3-Hydroxy-9-hexadecenoylcarnitine	HMDB13333	0.388912
175.0667@4.022022	C7 H13 N O2 S	3-Indoleacetic Acid	HMDB00197	0.550503
863.6123@14.71524	863.6123@14.71524	3-O-Sulfogalactosylceramide (d18:1/22:0)	HMDB12316	1.40256
406.2736@10.893942	C24 H39 Cl N2 O	7-Ketodeoxycholic acid	HMDB00391	0.551296
119.022@7.913689	C3 H5 N O4	Aminomalonic acid	HMDB01147	1.0742
274.0837@1.040909	C10 H15 Cl N4 O3	Glutamyl-Glutamate	HMDB28818	2.04506
286.2146@11.149307	C17 H26 N4	Hexadecanedioic acid	HMDB00672	0.779996
262.0828@7.829856	C14 H14 O5	L-beta-aspartyl-L-glutamic acid	HMDB11164	1.82964
625.3104@11.953799	C26 H55 N7 S5	Leukotriene C4	HMDB01198	0.710073
493.3219@9.259652	C29 H43 N5 S	LysoPC(16:1(9Z))	HMDB10383	1.74049
479.3043@11.374234	C30 H41 N O4	LysoPE(0:0/18:1(9Z))	HMDB11476	0.709126
501.2885@10.716215	C17 H35 N13 O5	LysoPE(20:4/0:0)	HMDB11517	0.657021
635.4529@13.547854	C41 H57 N5 O	PE(14:0/14:0)	HMDB08821	0.583787
851.5692@14.430618	851.5692@14.430618	PE(DiMe(11,3)/DiMe(11,5))	HMDB61472	1.03788
851.5678@14.32044	851.5678@14.32044	PE(MonoMe(13,5)/MonoMe(9,5))	HMDB61542	0.555708
807.5033@14.620144	807.5033@14.620144	PS(16:0/22:6(4Z,7Z,10Z,13Z,16Z,19Z))	HMDB12362	1.32048
831.503@14.5089855	831.503@14.5089855	PS(18:2(9Z,12Z)/22:6(4Z,7Z,10Z,13Z,16Z,19Z))	HMDB12406	1.48083
368.3655@14.29814	C24 H48 O2	Tetracosanoic acid	HMDB02003	0.759769
354.3501@14.543146	C23 H46 O2	Tricosanoic acid	HMDB01160	0.761586
521.2321@1.0212353	C24 H35 N5 O6 S	unidentified	-	0.601905
312.1485@5.279963	C18 H20 N2 O3	unidentified	-	0.618437
600.2589@5.7746086	C31 H44 N4 O2 S3	unidentified	-	1.9216
486.1758@5.9881916	C17 H30 N10 O S3	unidentified	-	0.797718
422.1953@7.1341662	C23 H26 N4 O4	unidentified	-	0.930142
358.1021@7.7828784	C15 H14 N6 O5	unidentified	-	0.661336
484.2118@7.8167915	C27 H32 O8	unidentified	-	1.7017
152.1204@7.8279595	C10 H16 O	unidentified	-	1.67693
240.1015@7.8278923	C12 H16 O5	unidentified	-	1.60259
664.2111@7.912565	C27 H28 N12 O9	unidentified	-	1.46392
328.1075@8.035125	C18 H12 N6 O	unidentified	-	0.690682
533.3004@8.585653	C30 H47 N O3 S2	unidentified	-	2.16876
528.2174@8.686259	C22 H44 N2 O4 S4	unidentified	-	0.78693
396.2511@8.693904	C23 H32 N4 O2	unidentified	-	0.738864
557.3339@8.737123	C24 H51 N3 O9 S	unidentified	-	0.537359
316.1884@8.862731	C17 H32 O S2	unidentified	-	0.318524
412.2102@9.125026	C22 H36 O3 S2	unidentified	-	0.623639
549.2409@9.259225	C36 H36 Cl N O2	unidentified	-	1.77373
585.2914@9.258847	C28 H39 N7 O7	unidentified	-	1.60806
449.3149@9.259929	C27 H39 N5 O	unidentified	-	1.68752
563.3319@9.259576	C32 H53 N O S3	unidentified	-	1.92478
652.3817@9.952043	C37 H56 N4 O2 S2	unidentified	-	2.05806
430.2569@10.043635	C23 H34 N4 O4	unidentified	-	0.724009
444.2741@10.210526	C24 H36 N4 O4	unidentified	-	0.303329
631.3143@10.348842	C30 H53 N3 O5 S3	unidentified	-	0.444072
563.3253@10.34223	C34 H45 N O6	unidentified	-	0.617118
612.2951@10.349132	C40 H40 N2 O4	unidentified	-	1.6328
358.235@10.463242	C20 H38 O S2	unidentified	-	0.424222
527.3223@10.504148	C28 H37 N11	unidentified	-	0.445101
675.2914@10.627063	C40 H37 N9 S	unidentified	-	0.744716
741.4611@10.633788	C32 H55 N17 O4	unidentified	-	0.639149
637.2715@10.633339	C35 H43 N O8 S	unidentified	-	0.765399
681.2806@10.63531	C38 H51 N O2 S4	unidentified	-	0.71122
569.2785@10.713687	C27 H43 N3 O8 S	unidentified	-	0.691929
703.3199@10.804943	C41 H53 N O3 S3	unidentified	-	0.850941
593.2772@10.829204	C29 H43 N3 O8 S	unidentified	-	1.7681
625.2146@10.831886	C39 H32 Cl N3 O3	unidentified	-	1.7322
1044.627@10.839164	1044.627@10.839164	unidentified	-	1.34238
978.5717@10.920095	978.5717@10.920095	unidentified	-	0.566003
659.3446@11.005023	C31 H53 N3 O10 S	unidentified	-	0.691394
655.3202@11.026397	C37 H53 N O3 S3	unidentified	-	0.741162
681.2606@11.025228	C41 H31 N9 O2	unidentified	-	0.831018
578.3876@11.100937	C31 H62 O3 S3	unidentified	-	1.70237
731.2781@11.198778	C45 H41 N5 O S2	unidentified	-	0.704675
739.287@11.200982	C31 H54 Cl N5 O7 S3	unidentified	-	0.821939
663.2854@11.201982	C37 H45 N O8 S	unidentified	-	0.765219
581.3246@11.202703	C35 H48 Cl N O4	unidentified	-	0.805682
705.3388@11.202723	C34 H55 N7 O S4	unidentified	-	0.660053
677.3056@11.209731	C29 H39 N15 O3 S	unidentified	-	0.685275
628.2914@11.260659	C20 H36 N16 O8	unidentified	-	0.759848
655.3191@11.261306	C37 H53 N O3 S3 ESI-120.0V 11.261306	unidentified	-	0.848614
384.3009@11.293608	C21 H41 Cl N4	unidentified	-	0.816987
589.2651@11.349636	C29 H39 N3 O10	unidentified	-	1.17711
617.3722@11.385673	C31 H51 N7 O4 S	unidentified	-	0.576151
591.3558@11.420548	C36 H49 N O6	unidentified	-	0.758119
689.3052@11.56602	C40 H51 N O3 S3	unidentified	-	0.610515
753.3513@11.567279	753.3513@11.567279	unidentified	-	0.630707
729.3122@11.659913	C33 H39 N13 O7	unidentified	-	0.617679
1008.7226@11.764976	1008.7226@11.764976	unidentified	-	0.548749
613.3087@11.766803	C31 H51 N O7 S2	unidentified	-	0.760277
606.4102@11.781851	C32 H66 N2 S4	unidentified	-	1.8623
672.2759@11.885333	C39 H45 Cl N2 O4 S	unidentified	-	2.95929
682.3095@11.885856	C32 H42 N8 O9	unidentified	-	2.22354
656.4356@11.889628	C36 H64 O8 S	unidentified	-	0.62731
639.3263@11.956446	639.3263@11.956446	unidentified	-	0.502825
619.3906@12.074108	C33 H54 Cl N5 O4	unidentified	-	0.603108
714.3323@12.031636	C34 H50 N8 O5 S2	unidentified	-	2.42759
478.3476@12.112498	C26 H54 O3 S2	unidentified	-	0.866064
637.3572@12.202698	C21 H51 N9 O13	unidentified	-	1.4142
895.5923@12.264185	895.5923@12.264185	unidentified	-	0.553554
494.2888@12.272128	C24 H50 N2 S4	unidentified	-	0.665977
410.2657@12.271689	C23 H38 O6	unidentified	-	0.762601
630.4681@12.27318	C35 H62 N6 O2 S	unidentified	-	0.637125
829.6237@12.336804	829.6237@12.336804	unidentified	-	0.710191
592.47@12.517934	C33 H68 O6 S	unidentified	-	0.627287
691.3678@12.640474	C36 H49 N7 O7	unidentified	-	0.591525
468.3213@12.6831875	C23 H44 N6 O2 S	unidentified	-	0.713466
532.3758@12.697728	C25 H53 Cl N8 S	unidentified	-	0.479737
833.6505@12.957269	833.6505@12.957269	unidentified	-	0.578632
534.3923@13.018949	C32 H55 Cl N2 O2	unidentified	-	0.452843
536.4103@13.202339	C29 H60 O6 S	unidentified	-	0.51005
916.6064@13.567465	916.6064@13.567465	unidentified	-	0.625852
760.5049@13.660276	760.5049@13.660276	unidentified	-	2.22778
434.376@13.854357	C28 H50 O3	unidentified	-	0.691667
611.4526@13.92119	C39 H65 N S2	unidentified	-	0.577346
773.4497@13.945297	773.4497@13.945297	unidentified	-	0.602779
436.3953@14.161627	C18 H48 N10 O2	unidentified	-	0.684052
825.552@14.245051	825.552@14.245051	unidentified	-	0.597111
919.5555@14.33311	919.5555@14.33311	unidentified	-	0.713976
987.5525@14.335879	987.5525@14.335879	unidentified	-	0.709755
895.5556@14.377382	895.5556@14.377382	unidentified	-	0.850809
1005.5203@14.365049	1005.5203@14.365049	unidentified	-	1.82226
723.6813@14.533703	C43 H89 N5 O S	unidentified	-	1.80346
829.5847@14.6865635	829.5847@14.6865635	unidentified	-	0.682653
791.5556@14.878608	791.5556@14.878608	unidentified	-	1.58286
815.6123@14.9475	815.6123@14.9475	unidentified	-	0.612391
841.6197@15.080435	841.6197@15.080435	unidentified	-	0.804471
819.5405@15.122224	819.5405@15.122224	unidentified	-	0.671542
961.6396@15.307097	961.6396@15.307097	unidentified	-	0.756354
883.6306@15.368472	883.6306@15.368472	unidentified	-	0.463317
830.6525@15.5152025	830.6525@15.5152025	unidentified	-	0.674742
869.6597@15.599821	869.6597@15.599821	unidentified	-	0.58789
937.6391@15.6017275	937.6391@15.6017275	unidentified	-	0.625281
939.5645@15.621572	939.5645@15.621572	unidentified	-	1.79054
847.5706@15.631532	847.5706@15.631532	unidentified	-	0.602946
1005.6258@15.783868	1005.6258@15.783868	unidentified	-	0.823275
869.6513@15.786153	869.6513@15.786153	unidentified	-	0.764262
915.5679@15.815821	915.5679@15.815821	unidentified	-	0.717473
909.6088@15.925089	909.6088@15.925089	unidentified	-	1.36655
986.6159@16.101648	986.6159@16.101648	unidentified	-	2.05678
897.691@16.515112	897.691@16.515112	unidentified	-	0.812192
1033.6628@16.520664	1033.6628@16.520664	unidentified	-	0.754187
807.6153@16.551876	807.6153@16.551876	unidentified	-	0.578677
946.645@16.869623	946.645@16.869623	unidentified	-	1.39506
506.1944@7.817622	C26 H22 N10 O2	unidentified	-	1.69781
502.184@7.827378	C19 H30 N6 O8 S	unidentified	-	1.94748
308.0889@7.830138	C15 H16 O7	unidentified	-	1.99031
613.2733@11.268823	C34 H39 N5 O4 S	unidentified	-	1.77239
685.2877@12.264698	C35 H39 N7 O8	unidentified	-	1.439
660.3853@13.896269	C30 H64 N2 O7 S3	unidentified	-	1.60776
931.6003@14.7218	931.6003@14.7218	unidentified	-	1.79999
573.4942@14.857938	C34 H68 Cl N O3	unidentified	-	1.30609
859.5343@14.893836	859.5343@14.893836	unidentified	-	1.72894
787.56@14.911411	787.56@14.911411	unidentified	-	2.05731
701.6238@16.045158	C39 H83 N5 O3 S	unidentified	-	1.43457
